# Supplementary material for: A two-dimensional thin Co-MOF nanosheet as a nanozyme with high oxidase-like activity for GSH detection
Source: Royal Society of Chemistry journal article supplement (doi:10.1039/d2nj00876a), 2022-01-01
Supplement: d2nj00876a1.pdf [file d2nj00876a1.pdf]

## Supplementary Information

### **A two-dimensional thin Co-MOF nanosheet as nanozyme with high oxidase-like activity for GSH detection**

Miaomiao Han, Mengzhen Ren, Zhaohui Li , Lingbo Qu, Lanlan Yu\*

*College of Chemistry, Zhengzhou Key Laboratory of Functional Nanomaterial and*

*Medical Theranostic, Zhengzhou University, Zhengzhou 450001, P.R. China*

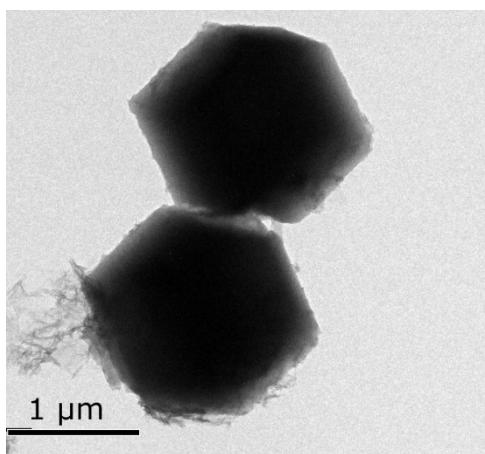

**Fig. S1** The TEM image of M-ZIF-67.

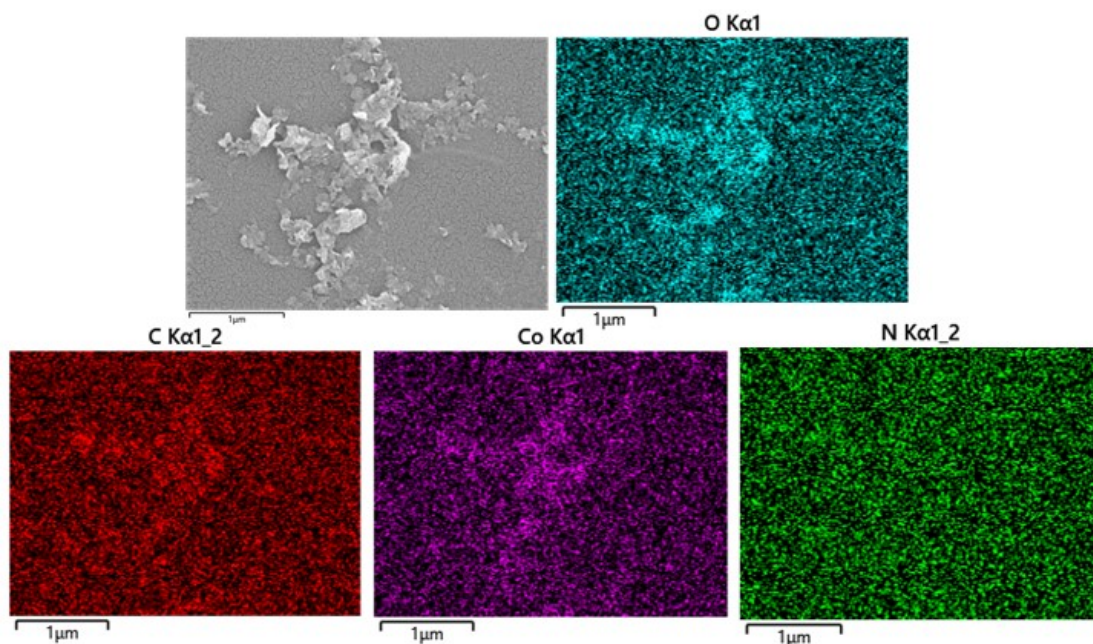

**Fig. S2** The EDS mapping analysis of D-ZIF-67.

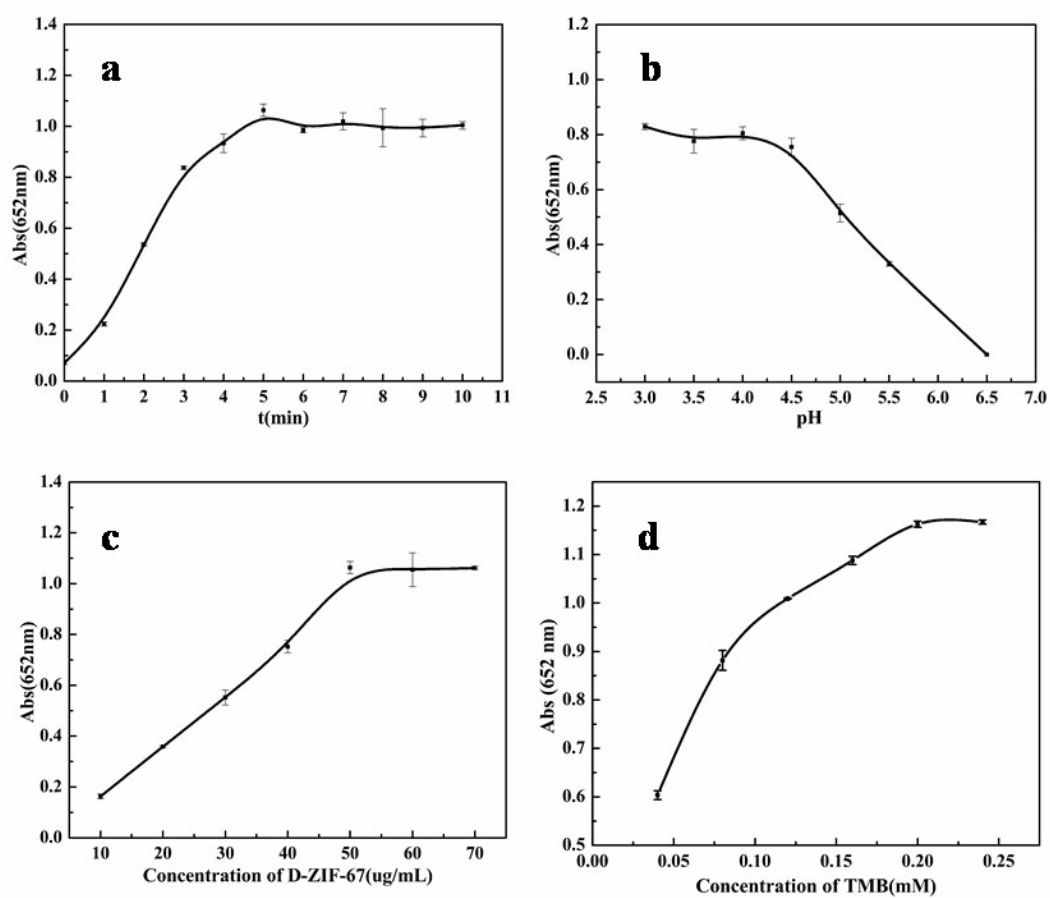

**Fig. S3** The effect of reaction time (a); pH of acetic acid buffer (b); concentration of D-ZIF-

67 (c); concentration of TMB (d) on the oxidase activity of D-ZIF-67.

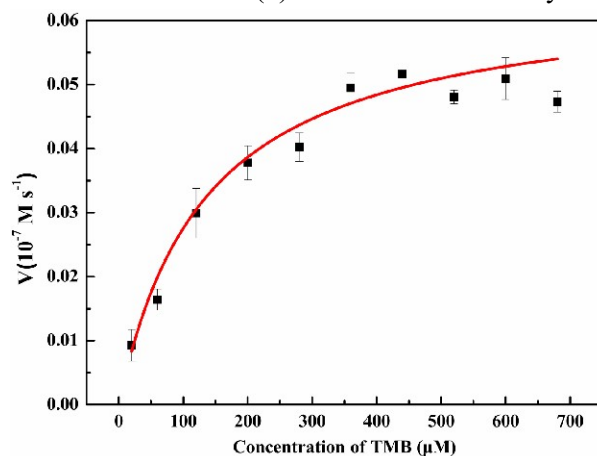

**Fig. S4** Steady-state kinetics assay of M-ZIF-67.

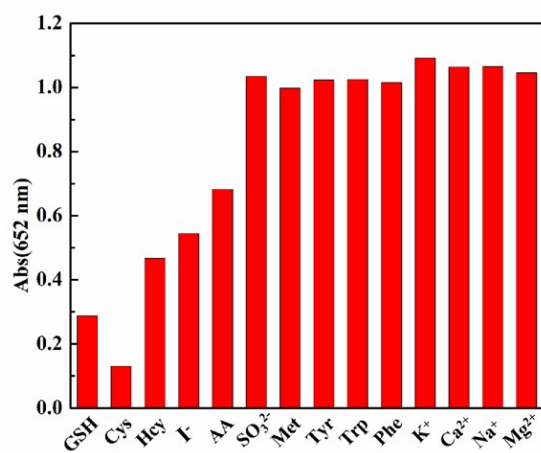

**Fig. S5** The influence of potential interferent substances on the GSH detection. The concentrations of GSH, Cys, Hcy, AA, and SO<sub>3</sub><sup>2-</sup> are 10 μM and those of others are 100 μM.

**Table S1** Comparison of different GSH detection methods.

| Material                                                | Measurement method     | Linear range | LOD      | Ref.      |
|---------------------------------------------------------|------------------------|--------------|----------|-----------|
| MnO <sub>2</sub> nanosheets                             | Colorimetry            | 1-25 μM      | 300 nM   | 1         |
| Ir/NC                                                   | Colorimetry            | 0.05-15 μM   | 0.5 μM   | 2         |
| PSMOF                                                   | Colorimetry            | 0-20 μM      | 0.68 μM  | 3         |
| gold nanoclusters                                       | Colorimetry            | 2-25 μM      | 420 nM   | 4         |
| Fe <sub>3</sub> O <sub>4</sub> magnetic nanoparticles   | Colorimetry            | 3-30 μM      | 3 μM     | 5         |
| UiO-66(NH <sub>2</sub> )                                | Colorimetry            | 5-120 μM     | 310 nM   | 6         |
| carbon dots–MnO <sub>2</sub> nanocomposites             | Fluorimetry            | 1-10 μM      | 300 nM   | 7         |
| quantum-dot                                             | Fluorimetry            | 5-250 μM     | 0.6 μM   | 8         |
| graphene quantum dot–MnO <sub>2</sub> nanosheet         | Fluorimetry            | 0.5-10 μM    | 150 nM   | 9         |
| conjugated polymer–Cu (II)                              | Fluorimetry            | 0.1-15 μM    | 40 nM    | 10        |
| core–shell CdSe/ZnS quantum dots/Nafion composite films | Electrochemical method | 10-180 μM    | 1.5 μM   | 11        |
| MoS <sub>2</sub> Nanosheet                              | Electrochemical method | 0.01-500 mM  | 703 nM   | 12        |
| Fe(CN) <sub>6</sub> <sup>3-/4-</sup> /carbon dots       | Electrochemical method | 0.1-1.0 μM   | 54.3 nM  | 13        |
| D-ZIF-67                                                | Colorimetry            | 0.5-10 μM    | 229.2 nM | This work |

## Notes and references

- 1 J. Liu, L. Meng, Z. Fei, P. Dyson, X. Jing and X. Liu, *Biosens. Bioelectron.*, 2017, **90**, 69–74.
- 2 M. Huang, H. Wang, D. He, P. Jiang and Y. Zhang, *Chem. Commun.*, 2019, **55**, 3634–3637.
- 3 Y. Liu, M. Zhou, W. Cao, X. Wang, Q. Wang, S. Li and H. Wei, *Anal. Chem.*, 2019, **91**, 8170–8175.
- 4 J. Feng, P. Huang, S. Shi, K. Deng and F. Wu, *Anal. Chim. Acta*, 2017, **967**, 64–69.
- 5 Y. Ma, Z. Zhang, C. Ren, G. Liu and X. Chen, *Analyst*, 2012, **137**, 485–489.
- 6 Z. Hu, X. Jiang, F. Xu, J. Jia, Z. Long and X. Hou, *Talanta*, 2016, **158**, 276–282.

- 7 Q. Cai, J. Li, J. Ge, L. Zhang, Y. Hu, Z. Li and L. Qu, *Biosens. Bioelectron.*, 2015, **72**, 31–36.
- 8 J. Liu, C. Bao, X. Zhong, C. Zhao and L. Zhu, *Chem. Commun.*, 2010, **46**, 2971–2973.
- 9 X. Yan, Y. Song, C. Zhu, J. Song, D. Du, X. Su and Y. Lin, *ACS Appl. Mater. Interfaces*, 2016, **8**, 21990–21996.
- 10 H. Huang, F. Shi, Y. Li, L. Niu, Y. Gao, S. Shah and X. Su, *Sens. Actuators B Chem.*, 2013, **178**, 532–540.
- 11 L. Dennany, M. Gerlach, S. O’Carroll, T. Keyes, R. Forster and P. Bertoncello, *J. Mater. Chem.*, 2011, **21**, 13984–13990.
- 12 B. Rawat, K. Mishra, U. Barman, L. Arora, D. Pal and R. Paily, *IEEE Sens. J.*, 2020, **20**, 6937–6944.
- 13 W. Niu, R. Zhu, S. Cosnier, X. Zhang and D. Shan, *Anal. Chem.*, 2015, **87**, 11150–11156.
